# Supplementary material
Source: PubMed Central journal article supplement (PMC4990943)
Supplement: jcsm.12.9.1215d.pdf [file jcsm.12.9.1215d.pdf]

**Table S1**—Least squares mean (95% CI) changes from baseline on outcome measures by treatment group for P028+P029.

|                       | Week-1 (Diary)/Night-1 (PSG)/<br>Week-2 (Ratings) |                      | Month-1               |                       | Month-3               |                       |
|-----------------------|---------------------------------------------------|----------------------|-----------------------|-----------------------|-----------------------|-----------------------|
|                       | Suvorexant<br>20/15mg                             | Placebo              | Suvorexant<br>20/15mg | Placebo               | Suvorexant<br>20/15mg | Placebo               |
| <i>Diary measures</i> | N=479                                             | N=740                | N=463                 | N=728                 | N=425                 | N=664                 |
| sTST, min             | 29.4 (25.5, 33.4)                                 | 14.4 (11.2, 17.6)    | 41.3 (36.4, 46.2)     | 22.9 (19.0, 26.8)     | 55.3 (49.9, 60.6)     | 39.3 ( 35.0, 43.6)    |
| sTSD, min             | -14.4 (-17.1, -11.6)                              | -8.3 (-10.5, -6.0)   | -18.6 (-22.0, -15.2)  | -13.0 (-15.8, -10.3)  | -24.9 (-28.3, -21.6)  | -19.0 (-21.6, -16.3)  |
| sWASO, min            | -17.4 (-20.2, -14.7)                              | -12.1 (-14.3, -9.9)  | -26.0 (-29.2, -22.8)  | -19.4 (-21.9, -16.8)  | -34.5 (-37.8, -31.3)  | -29.8 (-32.4, -27.2)  |
| sNAW, n               | -0.15 (-0.21, -0.09)                              | -0.17 (-0.22, -0.13) | -0.31 (-0.38, -0.24)  | -0.32 ( -0.37, -0.26) | -0.45 (-0.53, -0.38)  | -0.48 ( -0.54, -0.42) |
| sQUAL, 1-4 scale      | 0.24 (0.20, 0.28)                                 | 0.15 (0.12, 0.17)    | 0.35 (0.31, 0.39)     | 0.21 (0.18, 0.25)     | 0.21 (0.18, 0.25)     | 0.34 ( 0.31, 0.38)    |
| sFRESH, 0-4 scale     | 0.27 (0.22, 0.32)                                 | 0.17 (0.13, 0.20)    | 0.44 (0.38, 0.50)     | 0.28 (0.24, 0.33)     | 0.59 (0.53, 0.66)     | 0.46 ( 0.41, 0.52)    |
| <i>PSG measures</i>   | N=337                                             | N=574                | N=318                 | N=543                 | N=299                 | N=506                 |
| LPS, min              | -28.0 (-31.8, -24.2)                              | -16.8 (-19.7, -13.8) | -33.2 (-36.7, -29.6)  | -24.1 (-26.8, -21.3)  | -32.2 (-36.0, -28.4)  | -27.6 (-30.5, -24.7)  |
| WASO, min             | -55.1 (-59.3, -50.9)                              | -20.5 (-23.7, -17.3) | -46.1 (-50.7, -41.4)  | -20.6 (-24.2, -17.1)  | -48.0 (-52.9, -43.2)  | -25.0 (-28.7, -21.3)  |
| TST, min              | 81.0 (75.8, 86.1)                                 | 36.1 (32.2, 40.1)    | 77.6 (72.1, 83.1)     | 42.9 (38.8, 47.1)     | 78.3 (72.5, 84.1)     | 50.8 (46.3, 55.3)     |
| SE, % <sup>†</sup>    | 16.9 (15.8, 17.9)                                 | 7.5 (6.7, 8.4)       | 16.2 (15.0, 17.3)     | 8.9 (8.1, 9.8)        | 16.3 (15.1, 17.5)     | 10.6 (9.7, 11.5)      |
| <i>Rating scales</i>  | N=450                                             | N=704                | N=454                 | N=707                 | N=425                 | N=659                 |
| ISI, 0-28 scale       | -                                                 | -                    | -4.4 ( -4.8, -4.0)    | -3.0 ( -3.3, -2.7)    | -6.2 ( -6.6, -5.7)    | -4.9 ( -5.3, -4.6)    |
| CGI-S, 1-7 scale      | -0.8 (-0.9, -0.7)                                 | -0.5 (-0.6, -0.4)    | -1.0 (-1.1, -0.9)     | -0.6 (-0.7, -0.5)     | -1.3 (-1.4, -1.2)     | -1.0 (-1.1, -0.9)     |
| PGI-S, 0-5 scale      | -0.6 (-0.7, -0.6)                                 | -0.3 (-0.4, -0.3)    | -0.8 (-0.9, -0.7)     | -0.5 (-0.5, -0.4)     | -1.1 (-1.2, -1.0)     | -0.8 (-0.9, -0.7)     |
| CGI-I, 1-7 scale #    | 3.0 (2.9, 3.1)                                    | 3.4 (3.3, 3.4)       | 2.9 (2.8, 2.9)        | 3.3 (3.2, 3.3)        | 2.6 (2.5, 2.7)        | 3.0 (2.9, 3.1)        |
| PGI-I, 1-7 scale #    | 3.0 (2.9, 3.1)                                    | 3.3 (3.3, 3.4)       | 2.8 (2.7, 2.9)        | 3.2 (3.2, 3.3)        | 2.5 (2.4, 2.7)        | 2.9 (2.8, 3.0)        |

Ns shown are for sTST (diary measures), LPS (PSG measures) and PGI-S (rating scales); sample sizes differed for some of the other endpoints.

Results based on a mixed effects model with terms for baseline value, age category (<65, ≥65), region, gender, treatment, trial, time point, and treatment-by-time point interaction as covariates; cohort was also included in models for Diary and Rating scale measures.

<sup>†</sup> Post hoc analysis

# Value at timepoint (not change from baseline)

**Table S2**—Number (%) of patients with any adverse event and with somnolence over the 3-month primary treatment phase by age and gender subgroups for P028+P029.

|                         | <b>Suvorexant 20/15mg</b> | <b>Placebo</b> |
|-------------------------|---------------------------|----------------|
| <b>Age</b>              |                           |                |
| <i>≥1 adverse event</i> |                           |                |
| <65 years               | 130/291 (44.7)            | 196/449 (43.7) |
| ≥65 years               | 99/202 (49.0)             | 162/318 (50.9) |
| <i>Somnolence</i>       |                           |                |
| <65 years               | 22/291 (7.6)              | 13/449 (2.9)   |
| ≥65 years               | 11/202 (5.4)              | 12/318 (3.8)   |
| <b>Gender</b>           |                           |                |
| <i>≥1 adverse event</i> |                           |                |
| Men                     | 71/174 (40.8)             | 119/275 (43.3) |
| Women                   | 158/319 (49.5)            | 239/492 (48.6) |
| <i>Somnolence</i>       |                           |                |
| Men                     | 6/174 (3.4)               | 10/275 (3.6)   |
| Women                   | 27/319 (8.5)              | 15/492 (3.0)   |

**Table S3**—Number (%) of patients with vital sign or ECG measurements that met predetermined criteria over 3 months for P028+P029.

|                          |                                                               | <b>Suvorexant<br/>20/15mg<br/>(N=493)</b> | <b>Placebo<br/>(N=767)</b> |
|--------------------------|---------------------------------------------------------------|-------------------------------------------|----------------------------|
| <b>Parameter</b>         | <b>Predefined Limit</b>                                       | <b>n/m (%)</b>                            | <b>n/m (%)</b>             |
| <i>Vital Sign</i>        |                                                               |                                           |                            |
| Diastolic Blood Pressure | Value $\leq$ 50 mm Hg and Decrease $\geq$ 15 mm Hg            | 2/ 487 (0.4)                              | 2/ 757 (0.3)               |
|                          | Value $\geq$ 105 mmHg and Increase $\geq$ 15 mm Hg            | 1/ 487 (0.2)                              | 1/ 757 (0.1)               |
| Systolic Blood Pressure  | Value $\leq$ 90 mm Hg and Decrease $\geq$ 20 mm Hg            | 4/ 487 (0.8)                              | 2/ 757 (0.3)               |
|                          | Value $\geq$ 180 mm Hg and Increase $\geq$ 20 mm Hg           | 1/ 487 (0.2)                              | 3/ 757 (0.4)               |
| Pulse Rate               | Value $\leq$ 50 bpm and Decrease $\geq$ 15 bpm                | 1/ 487 (0.2)                              | 2/ 757 (0.3)               |
|                          | Value $\geq$ 120 bpm and Increase $\geq$ 15 bpm               | 1/ 487 (0.2)                              | 0/ 757 (0.0)               |
| Temperature              | Value $\geq$ 38.3°C and Increase $\geq$ 1°C                   | 0/ 487 (0.0)                              | 0/ 757 (0.0)               |
| Weight                   | $\geq$ 7% Decrease                                            | 7/ 485 (1.4)                              | 5/ 757 (0.7)               |
|                          | $\geq$ 7% Increase                                            | 10/ 485 (2.1)                             | 11/ 757 (1.5)              |
| <i>ECG</i>               |                                                               |                                           |                            |
| QTc Interval Bazett      | Prolongation compared to baseline $\geq$ 30 to $\leq$ 60 msec | 48/ 482 (10.0)                            | 79/ 752 (10.5)             |
|                          | Prolongation compared to baseline $>$ 60 msec                 | 1/ 482 (0.2)                              | 5/ 752 (0.7)               |
|                          | Value $\geq$ 500 msec                                         | 0/ 483 (0.0)                              | 0/ 755 (0.0)               |

N = Number of patients treated (took at least one tablet of study drug) during the indicated phase.

m = number of treated patients with valid pre- and post-treatment values of the parameter (except for the ECG “Value  $\geq$ 500 msec” parameter where m = number of treated patients with valid post-treatment value).

n = Number of patients meeting the predefined limit criteria.

Vital signs and ECGs were collected at each clinic visit - baseline, Week 2, Month 1, and Month 3, and additionally at Month 2 for vital signs.

**Table S4**—Summary of rebound as assessed by mean change from baseline values (in minutes) on self-report endpoints during the first 3 nights of the run-out phase, and on PSG endpoints during the first night of the run-out, for P028+P029.\*

| Run-out night | Suv→Pbo |              |                | Pbo→Pbo |              |                |
|---------------|---------|--------------|----------------|---------|--------------|----------------|
|               | N       | Mean (SD)    | 95% CI         | N       | Mean (SD)    | 95% CI         |
| <i>sTST</i>   |         |              |                |         |              |                |
| Night 1       | 206     | 23.8 (100.5) | (10.0, 37.6)   | 605     | 41.3 (98.4)  | (33.4, 49.1)   |
| Night 2       | 195     | 51.4 (84.9)  | (39.4, 63.4)   | 610     | 53.7 (96.5)  | (46.0, 61.3)   |
| Night 3       | 201     | 41.0 (90.8)  | (28.4, 53.6)   | 594     | 52.8 (92.6)  | (45.3, 60.3)   |
| <i>sTSO</i>   |         |              |                |         |              |                |
| Night 1       | 206     | -7.1 (87.5)  | (-19.1, 5.0)   | 605     | -19.8 (91.3) | (-27.1, -12.5) |
| Night 2       | 195     | -22.5 (58.2) | (-30.7, -14.3) | 610     | -24.4 (86.4) | (-31.2, -17.5) |
| Night 3       | 201     | -17.2 (68.9) | (-26.8, -7.6)  | 594     | -24.2 (74.2) | (-30.2, -18.2) |
| <i>WASO</i>   |         |              |                |         |              |                |
| Night 1       | 129     | -23.0 (64.1) | (-34.2, -11.8) | 436     | -31.8 (50.6) | (-36.5, -27.0) |
| <i>LPS</i>    |         |              |                |         |              |                |
| Night 1       | 131     | -34.5 (58.0) | (-44.5, -24.4) | 439     | -32.7 (45.5) | (-37.0, -28.5) |

\* Timing of run-out for self-report endpoints: in P028 after 3 months of treatment for patients who did not enter the extension or after 6 months for patients who entered the extension, in P029 after 3 months of treatment. Timing of run-out for PSG endpoints: 3 months after treatment in both P028+P029 (PQ-cohort).

Suv = suvorexant 20/15mg, Pbo = placebo; treatment x→treatment y = treatment received during the treatment phase→treatment received during the run-out phase

N = Number of randomized patients who took at least one dose of run-out phase study medication and had a value at baseline and during the run-out phase.

**Table S5**— Number and percentage of patients meeting Tyrer Withdrawal Symptom Questionnaire criteria for withdrawal during the first 3 nights of the run-out phase for P028+P029.\*

|                                       | <b>Suv→Suv</b> |          | <b>Suv→Pbo</b> |          | <b>Difference (95% CI)†</b> |
|---------------------------------------|----------------|----------|----------------|----------|-----------------------------|
|                                       | N              | n (%)    | N              | n (%)    | Suv→Suv vs. Suv→Pbo         |
| Night 1                               | 157            | 6 (3.8)  | 184            | 7 (3.8)  | 0.1 ( -4.3, 4.8)            |
| Night 2                               | 160            | 5 (3.1)  | 186            | 13 (7.0) | -3.9 ( -8.9, 0.9)           |
| Night 3                               | 151            | 7 (4.6)  | 182            | 9 (4.9)  | -0.2 ( -5.0, 5.1)           |
| Across Nights 1, 2 and 3 <sup>#</sup> | 172            | 11 (6.4) | 197            | 17 (8.6) | -2.1 ( -7.7, 3.5)           |

\* Timing of run-out: in P028 after 3 months of treatment for patients who did not enter the extension or after 6 months for patients who entered the extension, in P029 after 3 months of treatment.

Suv = suvorexant 20/15mg, Pbo = placebo; treatment x→treatment y = treatment received during the treatment phase→treatment received during the run-out phase

N = Number of randomized patients who took at least one dose of run-out phase study medication and had a value at baseline and during the run-out phase.

n = Number of patients with withdrawal (3 or more emergent or worsening withdrawal symptoms out of 20 withdrawal symptom items on the Tyrer Withdrawal Symptom Questionnaire).

† 95% CI computed using Miettinen and Nurminen method.<sup>37</sup>

<sup>#</sup>Total of 3 or more symptoms across the 3 nights (e.g., 1 withdrawal symptom on Night 1 and 2 other withdrawal symptoms on Night 3).

**Table S6**—Least squares mean change from baseline (95% CI) for Digit Symbol Substitution Test scores for P028+P029.

|                        | Night 1               |                | Month 1               |                | Month 3               |                |
|------------------------|-----------------------|----------------|-----------------------|----------------|-----------------------|----------------|
|                        | Suvorexant<br>20/15mg | Placebo        | Suvorexant<br>20/15mg | Placebo        | Suvorexant<br>20/15mg | Placebo        |
| N                      | 338                   | 578            | 321                   | 551            | 307                   | 516            |
| Correct responses      | 1.6 (0.8, 2.5)        | 2.3 (1.7, 3.0) | 1.8 (0.8, 2.8)        | 2.2 (1.4, 2.9) | 2.4 (1.3, 3.4)        | 2.9 (2.1, 3.7) |
| Difference vs. placebo | -0.7 (-1.8, 0.4)      | -              | -0.4 (-1.7, 0.9)      | -              | -0.5 (-1.9, 0.8)      | -              |
| Attempted responses    | 1.6 (0.7, 2.4)        | 2.3 (1.6, 3.0) | 1.7 (0.7, 2.7)        | 2.2 (1.4, 3.0) | 2.3 (1.2, 3.3)        | 2.8 (2.0, 3.6) |
| Difference vs. placebo | -0.7 (-1.8, 0.4)      | -              | -0.5 (-1.8, 0.8)      | -              | -0.5 (-1.8, 0.8)      | -              |

Based on a mixed effects model with terms for baseline value, age category (<65, ≥65), region, gender, treatment, timepoint, and treatment-by-time point interaction as covariates.

Mean scores at baseline were as follows: correct responses – suvorexant 20/15mg = 51, placebo = 52; attempted responses – suvorexant 20/15mg = 51, placebo = 52.

**Figure S1**—Patient accounting flowchart for P028+P029 0-3 months.

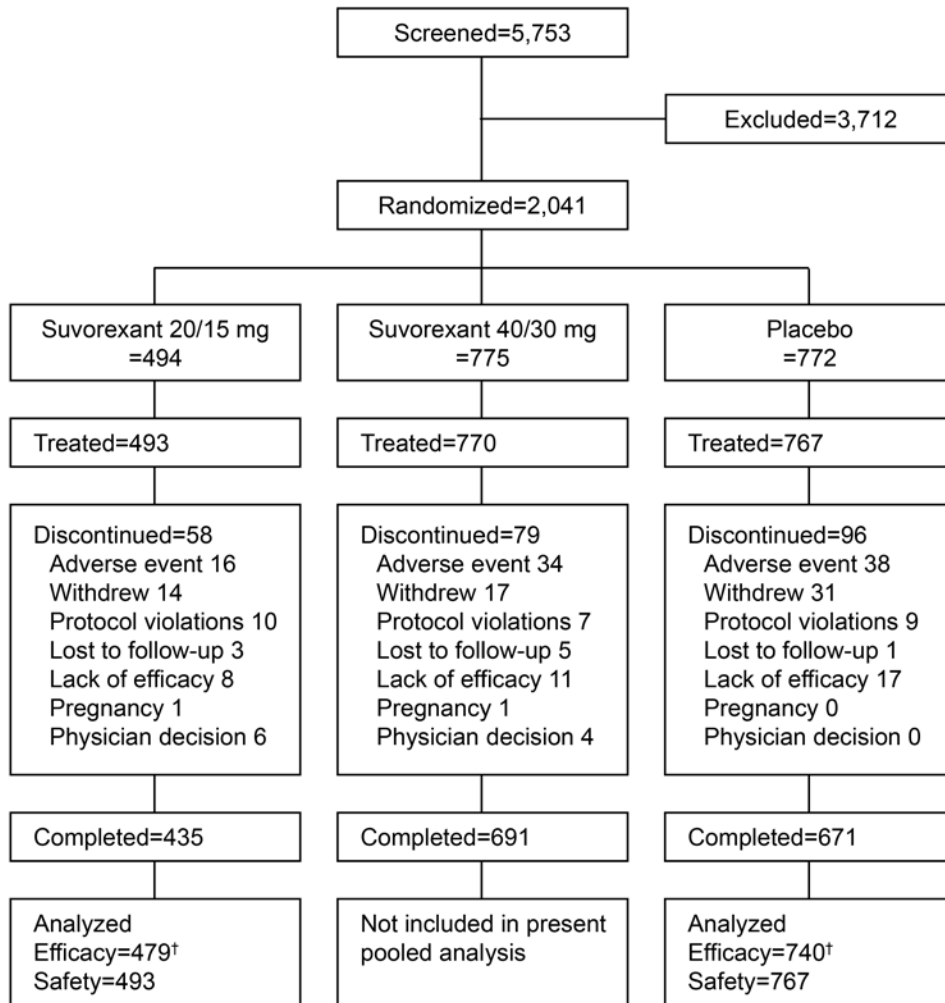

<sup>†</sup>Number analyzed for efficacy = the number included in the assessment of sTST at Week-1; fewer than the number treated due to missing data and also because data from one site in P029 were excluded due to concerns about data integrity.

**Figure S2**—Summary of sleep maintenance efficacy at Month 3 by subgroups for P028+P029.

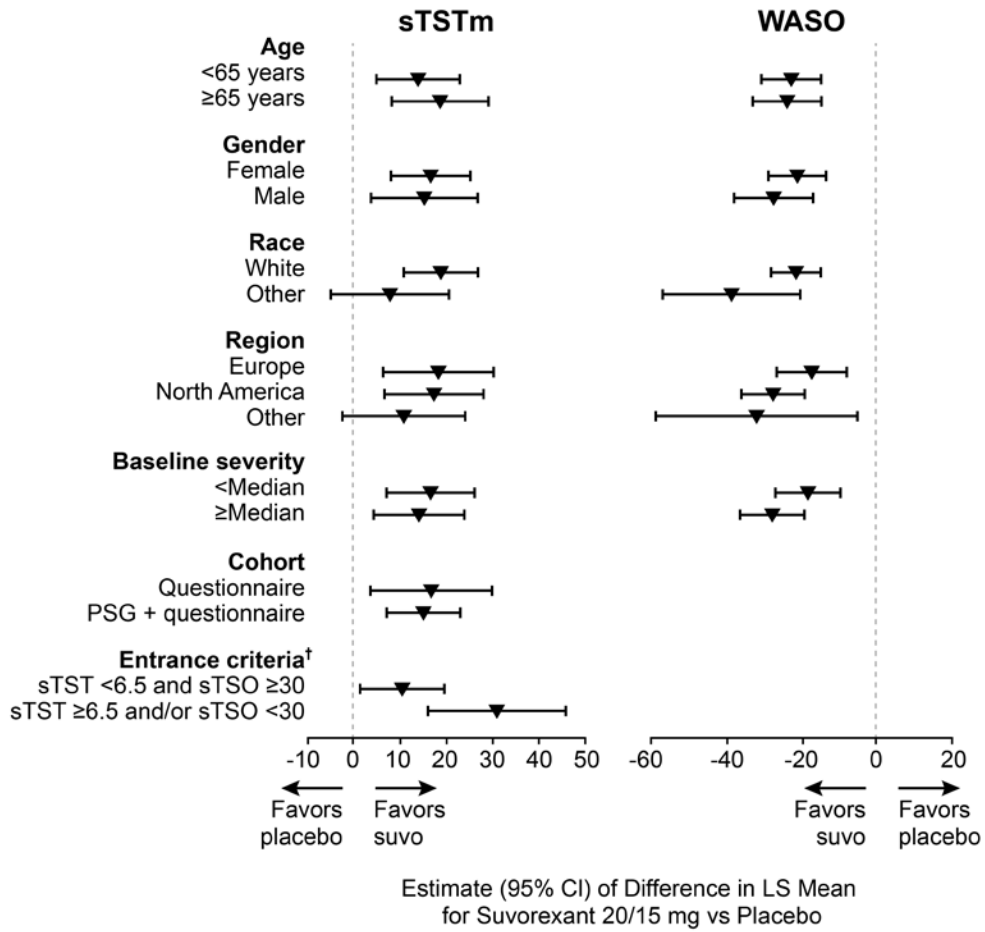

†PQ cohort only.



**Figure S3**—Summary of sleep onset efficacy at Month 3 by subgroups for P028+P029.

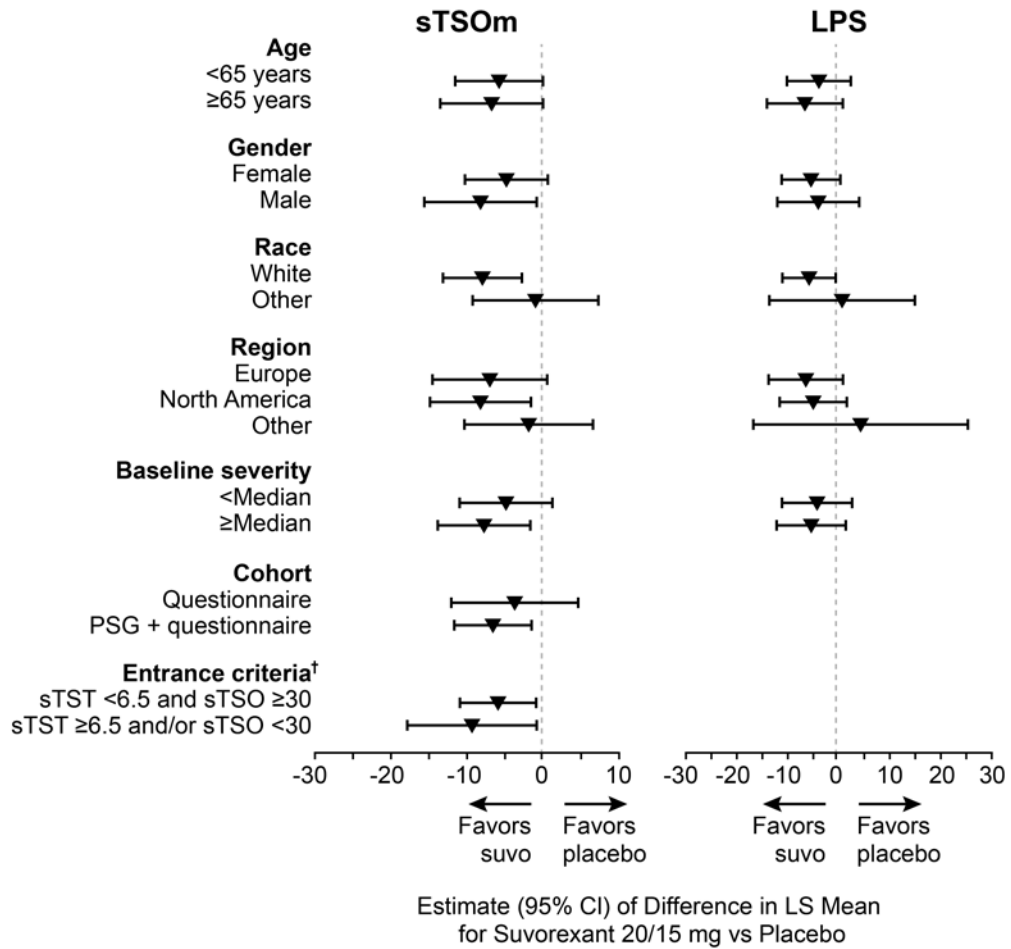

<sup>†</sup>PQ cohort only.
